# 1 Seroprevalence and associated factors of maternal 2 cytomegalovirus in Southern Ethiopia

3 \*Mengistu Hailemariam Zenebe<sup>1, 2, 3</sup>, Zeleke Mekonnen<sup>2</sup>, Eskindir Loha<sup>4, 5</sup> and Elizaveta  
4 Padalko<sup>3, 6</sup>

5 <sup>1</sup>School of Medical Laboratory Sciences, Hawassa University college of Medicine and Health  
6 Sciences, Hawassa, Ethiopia

7 <sup>2</sup> School of Medical Laboratory Sciences, Jimma University Institute of Health  
8 Jimma University, Jimma, Ethiopia

9 <sup>3</sup> Department of Diagnostic Sciences, Ghent University, Ghent, Belgium

10 <sup>4</sup> Centre for International Health, University of Bergen, Bergen, Norway

11 <sup>5</sup> Chr. Michelson Institute, Bergen, Norway

12 <sup>6</sup> Laboratory of Medical Microbiology, Ghent University Hospital, Ghent, Belgium

13

14 \*Corresponding author, mailing address: School of laboratory science Hawassa University

15 P.o.Box=1560, Hawassa, Ethiopia, Phone: (+251913641103), E-mail address:

16 [mengemariamzenebe@gmail.com](mailto:mengemariamzenebe@gmail.com)

17

18

## 19 Abstract

20 **Introduction:** Cytomegalovirus (CMV) is the most common infection during pregnancy that  
21 poses the risk of congenital CMV infections (cCMV) worldwide. The aim of this study was to  
22 assess the seroprevalence and associated factors of CMV among pregnant women in Southern  
23 Ethiopia.

24 **Method:** A cross-sectional study was conducted on consecutive women attending the delivery  
25 ward at Hawassa comprehensive and specialized hospital. Blood samples collected at the time of  
26 delivery were tested for CMV IgG and IgM using ELISA. Study participants responded to a  
27 questionnaire about obstetric history and socio-demographic characteristics. Data analysis was  
28 performed using SPSS version 20.0 software. Chi-square, bivariable and multivariable logistic  
29 regression were used to identify characteristics independently associated with the sero-status of  
30 CMV.

31 **Results:** Seropositivity for CMV IgM antibodies was 8.2% (49/600) (95% CI: 6 -10.5%),  
32 whereas the CMV IgG was 88.6% (532/600), (95% CI: 89.5 - 94.0%). Seroprevalence was  
33 higher in women of older age, currently unmarried and having nursery schooled children.  
34 Moreover CMV seropositivity was significantly associated with any of detected curable STIs.  
35 Seroprevalence was not significantly related to previous adverse pregnancy outcome, gravidity,  
36 being a child day care occupant mother, and birth weight of the newborn.

37 **Conclusion:** In the present study, we identified a high rate of CMV IgM seropositivity among  
38 pregnant women in southern Ethiopia. Given that there is no existing CMV diagnosis, special  
39 attention should be designed for pregnant women in parallel to the existing antenatal care  
40 facility. Besides, training health care professionals will support awareness conception among  
41 pregnant women concerning the sequels of CMV infection during pregnancy.

## 42 Key questions

43

### 44 What is already known?

45 • Cytomegalovirus is the most common infection during pregnancy that can cause  
46 congenital CMV infections and known to cause long-term sequelae including  
47 sensorineural hearing loss of the developing fetus.

48 • However, data on maternal CMV infection lacking in Ethiopia besides there is no  
49 maternal CMV diagnostics and screening service for pregnant women.

### 50 What are the new findings?

51 • A high prevalence 8.3% of CMV IgM and 88.6% of CMV IgG documented.

52 • Seroprevalence associated with older age women, currently unmarried and having  
53 nursery schooled children in the household. Also CMV seropositivity was significantly  
54 associated with any of detected curable STIs.

### 55 What do the new findings imply?

56 • Known that there is no existing maternal CMV screening in Ethiopia, understanding the  
57 burden and the effect of maternal CMV infection will offer important information to the  
58 health care providers to prevent a sequel to the developing fetus.

59 • The current study provides valuable information on the associated factors with maternal  
60 CMV infection hence, training health care professionals will support awareness  
61 conception among pregnant women concerning the sequels for CMV infection during  
62 pregnancy.

## 63 Introduction

64 Cytomegalovirus (CMV) is the most common infection during pregnancy that poses the risk of  
65 congenital CMV infections (cCMV) worldwide.(1) In immunocompetent hosts, primary CMV  
66 infection may be asymptomatic or may cause mild self-limiting disease with fever, headaches,  
67 and myalgia and after primary infection the virus remains latent. Latency following a primary  
68 infection may relapse by periodic reactivations that give rise to recurrent infections later in life  
69 when the body immunity is suppressed.(2)

70 CMV infection or reactivation during pregnancy is mostly asymptomatic, however may lead to  
71 fetal infection and cCMV syndromes.(3) Congenital CMV infection of the fetus of mothers  
72 having pre-existing anti-CMV antibodies is also possible due to risk of reactivation or reinfection  
73 with a different strain of CMV during pregnancy.(4) Therefore unlike previous perception the  
74 high maternal CMV seroprevalence in developing countries like Ethiopia does not eliminate the  
75 threat of cCMV infection of the newborn. Worldwide cCMV following nonprimary maternal  
76 infections is more common in individuals of lower socioeconomic background.(5)

77 So far studies have shown maternal seropositivity rates of previous infection ranging from low  
78 (50 to 70%) in developed countries, to high (>70%) in developing countries.(1) Presently, data  
79 on the prevalence of maternal CMV and associated risk factors are scanty in Ethiopia. The only  
80 available study conducted in Ethiopia had reported the prevalence of 15.5% for IgM and 88.6%  
81 for CMV IgG.(6)

82 In Africa the highest prevalence of CMV IgG was estimated ranging from 72 – 97.5% (7, 8) and  
83 of CMV IgM antibodies ranging from 0-15.5%.(9) However, for several reasons CMV infection

84 among pregnant women in Africa have been overlooked.(10) One of the main reasons for  
85 inattention is the perception that being infected in early childhood endures immunity for  
86 subsequent infection, so maternal reactivation or reinfection during pregnancy is unlikely to  
87 cause severe congenital infection.(11) However, in pregnant women the immune system is  
88 somehow suppressed. So ignoring maternal CMV and the subsequent effect of cCMV infection  
89 in Africa is short-sighted; furthermore, the possible confounding effects of HIV infection,  
90 malnutrition, tuberculosis, and a general higher disease burden of the continent must be taken  
91 into account.(12)

92 The objective of the study was to assess the seroprevalence of CMV among pregnant women and  
93 determine associated factors in Southern Ethiopia. Information about maternal the prevalence of  
94 CMV and associated risk factors is almost absent in Ethiopia and this study was the first in the  
95 southern region. We hope the study will attract health care professional attention and improve  
96 antenatal care in this domain. In the meantime it will generate awareness to the community,  
97 mainly pregnant women, regarding the consequence of CMV during pregnancy in Ethiopia.

## 98 Methodology

### 99 Study setting and recruitment

100 From August to October 2020, a cross-sectional study was conducted among pregnant women  
101 who came for delivery in the obstetrics ward at Hawassa University Comprehensive and  
102 Specialized Hospital (HU-CSH), Ethiopia. Interrelated with the first phase of this project, where  
103 the initial 350 pregnant women had been tested for curable STI (*C. trachomatis*, *N. gonorrhoeae*  
104 and *T. vaginalis*) using GeneXpert (Xpert CT/NG and Xpert TV assays, Cepheid, Sunnyvale,

105 California, USA), our manuscript being submitted and under review (manuscript number PONE-  
106 D-20-37668). In this second phase of the study, by including those initially enrolled 350  
107 pregnant women, a total of 600 consecutively enrolled pregnant women were participated.  
108 Pregnant women were recruited upon delivery regardless of gestational age. A midwife at the  
109 obstetric ward provided general information about the study to all pregnant women before  
110 recruitment.

### 111 **Socio-demographic, obstetric and behavioral data**

112 Trained midwife at the obstetric ward provided general information about the study to pregnant  
113 women who came for delivery. Pregnant women agreeing to join in the study were interviewed  
114 using a structured questionnaire translated in Amharic, the language spoken by most people in  
115 the study area. The translated questionnaire was pre-tested on random mother at antenatal clinic  
116 to ensure the validity and feasibility of the questions as conducted in similar studies. Information  
117 related to socio-demographic characteristics (e.g., age, marital status, and educational level),  
118 obstetric history, and behavioral data were collected.

### 119 **Sample collection and storage**

120 The midwife-nurse aseptically collected a 3 ml blood sample from each subject. The collected  
121 samples were transported to the HU-CMHS microbiology laboratory within 12 hours of  
122 collection and the processed serums stored at  $-20\text{ C}^0$  until analysis.

## 123 **Laboratory methods**

124 Testing was performed in Belgium, Ghent University hospital, department of laboratory  
125 medicine, using a commercially available enzyme immunoassay (ELISA) kit (EUROIMMUN  
126 Medizinische Labordiagnostika AG, Lübeck, Germany) for anti-CMV IgG and IgM according to  
127 the manufacturer's instructions. Results were evaluated semi-quantitatively by calculating a ratio  
128 of the extinction value of the patient sample over the extinction value of the calibrator optical  
129 density at 450 nm. Seropositivity was defined according to the guidelines given by the  
130 manufacturer, CMV negative when the ratio cut off value was  $< 0.8$ , borderline between 0.8 and  
131 1.1, and positive if  $> 1.1$  for both IgG and IgM.

## 132 **Ethical considerations**

133 Ethical approval from all of the appropriate institutional review boards was obtained. The ethics  
134 review committee of Hawassa University (CMHS/283/2012), Jimma University  
135 (IHRPGD/458/2020), National Health Research Ethics Review Committee (SRA/14.1/  
136 144483/2020) Ethiopia, and Ghent University (PA2019-038/BC-08458) Belgium, approved the  
137 study. All participants provided written, informed consent for study participation.

## 138 **Data analysis**

139 Descriptive statistics were used to characterize the socio-demographic and obstetric and medical  
140 characteristics of the participants. We evaluated the seroprevalence of CMV and associated  
141 factors using a logistic regression model. Bivariate comparisons using Chi-square or Fisher's  
142 exact test where suitable were used to examine the relationships between participant  
143 characteristics and CMV test result. Finally, multivariable logistic regression was used to

144 identify characteristics independently associated with sero-status of CMV and adjusting for other  
145 factors. Variables with a significant level of  $\leq 0.2$  were included in the final model. P value <  
146 0.05 is considered statistically significant. SPSS software version 20.0 (SPSS Inc. Chicago, IL,  
147 USA) was used for all analyses.

## 148 Results

149 Six hundred pregnant women were assessed for seroprevalence of CMV. The mean of maternal  
150 age was  $27.0 \pm$  (SD) 5.2, with a ranging between 17 and 41. More than one-third of the study  
151 participant were under the age of 25. About one-fourth of the women were Primigravida. Out of  
152 the 600 participant 84 (14%) were currently unmarried, 475 (79.2%) were residing in urban  
153 setting, 377 (62%) were above or at secondary level of education. Forty-eight (8%) of the  
154 newborns were under-weighted (<2.5 Kg), and 64 (10%) of the births were preterm. Regarding  
155 STIs test result, 51 (14.6%) pregnant women were tested positive for any of curable STIs (Table  
156 1).

157 In this study, around 96% of mothers had no knowledge of congenitally transmitted infection or  
158 the associated risks in pregnancy and about 9% of them had previous adverse pregnancy  
159 outcome. The chi-square analysis shown that, seropositivity for CMV IgM significantly  
160 associated ( $p < 0.05$ ) with marital status, gestational age, having nursery school baby in the  
161 household, sharing a cup with children and having any of detected curable STIs. However, there  
162 was no significant association with birth weight, gravidity and having previous adverse  
163 pregnancy outcome i.e. preterm birth, stillbirths and early neonatal death (Table 1).



164 **Table 1 Maternal characteristics and associated factor with CMV IgM seropositivity in**  
 165 **Southern Ethiopia**

| <b>Characteristics</b>                | <b>Total (N=600)<br/>n (%)</b> | <b>IgM-Positive<br/>(n=49) n (%)</b> | <b>IgM-Negative<br/>(n=551) n (%)</b> | <b>p-value</b> |
|---------------------------------------|--------------------------------|--------------------------------------|---------------------------------------|----------------|
| <b>Age of mothers (years)</b>         |                                |                                      |                                       |                |
| <25                                   | 233 (38.8)                     | 14 (28.6)                            | 219 (39.7)                            | 0.148          |
| 25-29                                 | 162 (27.0)                     | 14 (28.6)                            | 148 (26.9)                            |                |
| 30- 35                                | 170 (28.3)                     | 15 (30.6)                            | 155 (28.1)                            |                |
| >35                                   | 35 (5.8)                       | 6(12.2)                              | 29 (5.3)                              |                |
| <b>Marital status</b>                 |                                |                                      |                                       |                |
| Married                               | 516 (86.0)                     | 37 (75.5)                            | 479 (86.9)                            |                |
| Currently unmarried                   | 84 (14.0)                      | 12 (24.5)                            | 72 (13.1)                             | 0.027          |
| <b>Residence</b>                      |                                |                                      |                                       |                |
| Urban                                 | 475 (79.2)                     | 44 (89.8)                            | 431 (78.2)                            | 0.056          |
| Rural                                 | 125 (20.8)                     | 5 (10.2)                             | 120 (21.8)                            |                |
| <b>ANC follow up during pregnancy</b> |                                |                                      |                                       |                |
| Yes                                   | 576 (96.0)                     | 48 (98.0)                            | 528 (95.8)                            |                |
| no                                    | 24 (4.0)                       | 1 (2.0)                              | 23 (4.2)                              | 0.712          |
| <b>Employed as daycare worker</b>     |                                |                                      |                                       |                |
| Yes                                   | 40 (6.7)                       | 6 (12.2)                             | 34 (6.2)                              | 0.126          |
| No                                    | 560 (93.3)                     | 43 (87.8)                            | 517 (93.8)                            |                |
| <b>Employed as health care</b>        |                                |                                      |                                       |                |
| Yes                                   | 32 (5.3)                       | 6 (12.2)                             | 26 (4.7)                              | 0.055          |
| no                                    | 568 (94.7)                     | 43 (87.8)                            | 525 (95.3)                            |                |
| <b>Education</b>                      |                                |                                      |                                       |                |
| Primary and below                     | 223 (37.2)                     | 13 (26.5)                            | 210 (38.1)                            | 0.108          |

|                                                         |            |           |            |        |
|---------------------------------------------------------|------------|-----------|------------|--------|
| Secondary and above                                     | 377 (62.8) | 36 (73.5) | 341 (61.9) |        |
| <b>Gestational age</b>                                  |            |           |            |        |
| Term                                                    | 536 (89.3) | 36 (73.5) | 500 (90.7) |        |
| Preterm                                                 | 64 (10.7)  | 13 (26.5) | 51 (9.3)   | <0.001 |
| <b>Birth weight</b>                                     |            |           |            |        |
| <2.5 Kg                                                 | 48 (8.0)   | 3 (6.1)   | 45 (8.2)   | 0.789  |
| >2.5 Kg                                                 | 552 (92.0) | 46 (93.9) | 506 (91.8) |        |
| <b>Gravidity</b>                                        |            |           |            |        |
| Primigravida                                            | 147 (24.5) | 14 (28.6) | 133 (24.1) | 0.489  |
| Multigravida                                            | 453(75.5)  | 35 (71.4) | 418 (75.9) |        |
| <b>Previous adverse pregnancy outcome *</b>             |            |           |            |        |
| Yes                                                     | 39 (8.6)   | 2 (5.7)   | 37 (8.9)   | 0.756  |
| No                                                      | 414 (91.4) | 33 (94.3) | 381 (91.1) |        |
| <b>Knowledge on congenitally transmitted infections</b> |            |           |            |        |
| Yes                                                     | 25 (4.2)   | 1 (2.0)   | 24 (4.4)   |        |
| No                                                      | 575 (95.8) | 48 (98.0) | 527 (95.6) | 0.712  |
| <b>Under-five children in the household</b>             |            |           |            |        |
| Yes                                                     | 396 (66.0) | 31 (63.3) | 365 (66.2) | 0.673  |
| no                                                      | 204 (43.0) | 18 (36.7) | 186 (33.8) |        |
| <b>Daycare or Nursery school baby in the household</b>  |            |           |            |        |
| Yes                                                     | 259 (43.2) | 31 (63.3) | 228 (41.4) | 0.003  |
| no                                                      | 341 (56.8) | 18 (36.7) | 323 (58.6) |        |
| <b>Sharing feeding cup with children</b>                |            |           |            |        |
| Yes                                                     | 107 (17.8) | 14 (28.6) | 93 (16.9)  | 0.040  |
| no                                                      | 493 (82.2) | 35 (71.4) | 458 (83.1) |        |

|                                               |            |           |            |       |
|-----------------------------------------------|------------|-----------|------------|-------|
| <b>Sharing eating utensil with children</b>   |            |           |            |       |
| Yes                                           | 88 (14.7)  | 8 (16.3)  | 80 (14.5)  | 0.732 |
| No                                            | 512 (85.3) | 41 (83.7) | 471 (85.5) |       |
| <b>Sharing teeth brush with children</b>      |            |           |            |       |
| Yes                                           | 42 (7.0)   | 3 (6.1)   | 39 (7.1)   | 0.999 |
| No                                            | 558 (93.0) | 46 (93.9) | 512 (92.9) |       |
| <b><i>N.gonorrhoeae</i> detected (n=350)</b>  |            |           |            |       |
| Yes                                           | 15 (4.3)   | 3 (10.0)  | 12 (3.8)   | 0.128 |
| No                                            | 333 (95.7) | 27 (90.0) | 306 (96.2) |       |
| <b><i>C. trachomatis</i> detected (n=350)</b> |            |           |            |       |
| Yes                                           | 29 (8.3)   | 5 (16.7)  | 24 (7.5)   | 0.089 |
| No                                            | 319 (91.7) | 25 (83.3) | 294 (92.5) |       |
| <b><i>T. vaginalis</i> detected (n=350)</b>   |            |           |            |       |
| Yes                                           | 11 (3.1)   | 2 (6.9)   | 9 (2.8)    | 0.241 |
| No                                            | 335 (96.8) | 27 (93.1) | 308 (97.2) |       |
| <b>Any of curable STI detected (n=350)</b>    |            |           |            |       |
| Yes                                           | 51 (14.6)  | 10 (33.3) | 41 (12.8)  | 0.005 |
| No                                            | 299 (85.4) | 20 (66.7) | 279 (87.2) |       |

166

167

168 \*previous adverse pregnancy includes; early neonatal death, stillbirth and preterm birth : STI; Sexually  
 169 transmitted infections

## 170 Seroprevalence

171 Seropositivity of CMV IgM antibodies was 8.2% (49/600) (95% CI: 6 -10.5%), whereas  
 172 seroprevalence of CMV IgG was 88.6% (532/600), (95% CI: 89.5 - 94.0%). Of 532 CMV IgG  
 173 positive women, 483 (80.4%) were negative for IgM. Among all pregnant women, 68 (11.4%)

174 were tested negative for both anti-CMV IgG and IgM, and none showed anti-CMV IgG  
175 negativity but IgM positivity (Table 2).

176 **Table 2 Cytomegalovirus IgM and IgG test result of pregnant women**

| Anti CMV IgM antibody | Anti CMV IgG antibody n (%) |          | Total n (%) |
|-----------------------|-----------------------------|----------|-------------|
|                       | Positive                    | Negative |             |
| Positive              | 49 (8.2)                    | 0 (0)    | 49 (8.2)    |
| Negative              | 483 (80.4)                  | 68(11.4) | 551 (91.8)  |
| Total                 | 532 (88.6)                  | 68(11.4) | 600         |

### 177 **CMV seropositivity and associated factors**

178 In bivariable analysis, seropositivity was more common in elder women (>35) compared to the  
179 youngest age group, in women who were currently unmarried, giving preterm birth, sharing a  
180 feeding cup with children or having nursery schooled children. Moreover women were positive  
181 for any of curable STIs also had a higher seroprevalence of CMV compared to those negative for  
182 STIs (Table 3).

183 Furthermore, in multivariable logistic regression maternal IgM seropositivity was associated  
184 with elder age groups (AOR = 4.9, 95% CI: 1.0–23.4), currently unmarried women (AOR = 3.8,  
185 95% CI: 1.7–7.9), preterm birth (AOR = 3.9, 95% CI: 1.5–10.3) and having nursery schooled  
186 children (AOR = 2.7, 95% CI: 1.1–6.4). Mothers with STIs has an association with  
187 seroprevalence (AOR = 4.1, 95% CI: 1.6–10.6) compared to mothers who were diagnosed  
188 negative for STIs.

189 Maternal seroprevalence was not significantly different in relation to residence, education level,  
190 to mother's occupation; being employed in child daycare or being health care worker (Table 3).

191 **Table 3. Unadjusted and adjusted associated factors of maternal CMV IgM seropositivity**  
 192 **in Southern Ethiopia**

| Characteristics               | Un adjusted     |         | Adjusted         |         |
|-------------------------------|-----------------|---------|------------------|---------|
|                               | OR 95% CI)      | P-value | OR (95% CI)      | P-value |
| <b>Age of mothers (years)</b> |                 |         |                  |         |
| <25                           | 1               |         | 1                |         |
| 25-29                         | 1.5 (0.7 -3.2)  | 0.318   | 1.2 (0.4 – 4.0)  | 0.739   |
| 30- 35                        | 1.5 (0.7 -3.2)  | 0.283   | 3.0 (1.0 – 9.0)  | 0.048   |
| >35                           | 3.2 (1.2– 9.1)  | 0.026   | 4.9 (1.0 – 23.4) | 0.047   |
| <b>Marital status</b>         |                 |         |                  |         |
| Married                       | 1               |         | 1                |         |
| Currently unmarried           | 2.2 (1.1 -4.3)  | 0.030   | 3.8 (1.3 -11.2)  | 0.015   |
| <b>Residence</b>              |                 |         |                  |         |
| Urban                         | 2.5 (1.0 -6.3)  | 0.064   | 2.3 (0.7 -7.9)   | 0.171   |
| Rural                         | 1               |         | 1                |         |
| <b>Daycare worker</b>         |                 |         |                  |         |
| Yes                           | 2.1 (0.8 -5.3)  | 0.110   | 1.1 (0.2- 5.4)   | 0.857   |
| No                            | 1               |         | 1                |         |
| <b>Health care worker</b>     |                 |         |                  |         |
| Yes                           | 2.8 (1.1 - 7.2) | 0.031   | 1.2 (0.2 – 7.4)  | 0.841   |
| no                            | 1               |         | 1                |         |
| <b>Education</b>              |                 |         |                  |         |
| Primary and below             | 0.6 (0.3 -1.1)  | 0.111   | 0.7 (0.3 -1.8)   | 0.475   |
| Secondary and above           | 1               |         | 1                |         |
| <b>Gestational age</b>        |                 |         |                  |         |
| Term                          | 1               |         | 1                |         |

|                                       |                 |        |                 |        |
|---------------------------------------|-----------------|--------|-----------------|--------|
| Preterm                               | 3.5 (1.8 – 7.1) | <0.001 | 3.9 (1.5 -10.3) | <0.006 |
| <b>Daycare or Nursery school baby</b> |                 |        |                 |        |
| Yes                                   | 2.4 (1.3 – 4.5) | 0.004  | 2.7 (1.1 – 6.4) | 0.027  |
| no                                    | 1               |        | 1               |        |
| <b>Sharing a cup with children</b>    |                 |        |                 |        |
| Yes                                   | 2.0 (1.1 – 3.8) | 0.044  | 2.2 (0.9 – 5.4) | 0.074  |
| no                                    | 1               |        |                 |        |
| <b>Any of curable STIs (n=350)</b>    |                 |        |                 |        |
| Yes                                   | 3.4 (1.5- 7.8)  | 0.004  | 4.1 (1.6- 10.6) | 0.003  |
| No                                    | 1               |        |                 |        |

193

## 194 Discussion

195 In this study an overall 8.2% CMV IgM and 88.7% seroprevalence of CMV IgG were detected  
 196 among pregnant women in southern Ethiopia. The associated factors of seropositivity were age,  
 197 marital status, the presence of a curable STIs and sharing a cup with children. A statistically  
 198 significant association was also observed between CMV seropositivity and preterm delivery.

199 The reported seropositivity of 88.6% CMV IgG in this study was comparable to a previous report  
 200 of 88.5% h in central Ethiopia but a substantially higher rate (15.5%) of CMV IgM was detected  
 201 in this study.(6) Seropositivity of CMV IgG in our study was in line with a review done in  
 202 Africa, with ranges from 60% to 100%.(9) Seropositivity rates of 77.3% for IgG and 8.1% for  
 203 IgM in Kenya,(7) 93% for IgG and 11.1% for IgM in Nigeria,(13) 94% for IgG and 8.5% for  
 204 IgM in Tanzania(14) were comparable to our finding.

205 In our study seroprevalence of CMV IgM is in concordance with several African studies.(7, 13-  
206 15) However, our rate was higher when compared to 0.4% in Tanzania,(16) 2.5% in Sudan,(17),  
207 and 7% in Egypt.(18) In the absence of maternal screening this high rate is alarming for policy  
208 makers. By far developed countries pregnant women are screened for CMV because of the  
209 consequence for the fetus and newborn.(19, 20) However, in most developing countries  
210 including Ethiopia, maternal CMV still lack awareness, overlooked and not diagnosed at least for  
211 pregnant women.(21) The high rate of positive CMV IgM may not only reflect primary infection  
212 but might also be attributed to reinfection or reactivation of CMV during pregnancy. So the  
213 reported high seropositivity in this study point to the existing negligence and the need to start  
214 screening to detect pregnant women at risk for congenital transmission of CMV.

215 In this study, elder age has significant association with seroprevalence. The same finding was  
216 reported in Sudan,(17) Kenya,(22), and Tanzania.(16) In addition a large scale study in London  
217 also reported that seropositivity increases with increasing age.(23) But, in a study in Egypt(18)  
218 and in Nigeria(24) age had no association with maternal CMV infection. The highest  
219 seroprevalence with age may indicate the more exposure of elders than youngsters or might be  
220 the existence of previous infection which can probably reactivated in the current pregnancy.

221 On the other hand, significant association of seroprevalence with having nursery schooled  
222 children among household was observed. For pregnant women the predictable source of CMV  
223 infection is young children mainly exposure to nursery schooled children.(25) Children easily get  
224 infected in school and frequently shed CMV in their saliva or urine for many years continuously  
225 where spreads readily in preschool setting.(26) This places seronegative pregnant women who  
226 have a young child in the home or in day care at increased risk of seroconversion.(27,  
227 28) Susceptibility to acquisition of CMV infection is high possibly through the direct contact

228 with contagious secretions from their own children essentially in situation of poor hygienic  
229 practice like in Ethiopia.(23)

230 Among candidate predictors for maternal CMV seropositivity, occupation like being health care  
231 worker, or child day care worker; being multigravida, lower educational level and having other  
232 children at home were not detected. However, significant association with women who delivered  
233 preterm was reported. Although, preterm delivery might be due to the effect of maternal CMV  
234 infection we can not to say the risk factor as there are a lot of other confounding factors for  
235 preterm.(29)

236 Likewise, seropositivity was found to be significantly associated with STIs detected at delivery  
237 and currently being unmarried. Mothers who were positive for any of curable STIs had a four-  
238 time CMV seropositivity. It is also reported that STIs including CMV is more common in  
239 unmarried pregnant women.(23, 25, 30) Although cytomegalovirus is a virus that is transmitted  
240 through many body fluids, sexual transmission from a seropositive male partner is an additional  
241 established route by which women may be infected with CMV.(31) Indeed, it is somehow  
242 expected that sexual transmission is also responsible for reinfection of seropositive mothers with  
243 different virus strains in high-seroprevalence populations.(32)

244 The limitations of the present study are that we lack differentiation of CMV IgM positives of  
245 either primary or secondary (reinfection or reactivation) since we collected samples at the end of  
246 pregnancy and avidity test will not suitable. Moreover, it was a hospital-based study and not  
247 representative of all pregnant mothers in the locality since a significant portion of mothers may  
248 not deliver in the hospital. We lack also appropriate risk factors assessment tool as we mainly



249 focused on seroprevalence and nature of the enrolled participant (time of labour), hence more  
250 representative large scale survey is needed to identify possible risk factors prospectively.

251

## 252 Conclusion

253 In the present study, we documented a high rate of CMV seroprevalence among pregnant women  
254 in southern Ethiopia. The presence of curable STIs, elder age, unmarried women, and having  
255 nursery schooled children have a significant association with seropositivity. Given that there is  
256 no existing CMV diagnostic facility, special attention should be designed for pregnant women in  
257 parallel to the existing antenatal care service. Besides, training health care professionals will  
258 support awareness conception for pregnant women concerning the sequels of CMV infection  
259 during pregnancy.

## 260 Acknowledgments

261 We thank the HU-CSH microbiology laboratory staffs for provision of all laboratory  
262 accommodations during sample processing and storage. We would like to recognise the study  
263 participants and a special thanks to midwife nurses at the obstetrics ward of the HU-CSH. Lastly,  
264 we want to express our thanks to VLIR-UOS for financial support.

265 **Author Contributions:** MH and EP contributed to the study design and conceptualisation. MH  
266 carried out the laboratory work. MH, EL, ZM and EP performed the statistical analysis and  
267 interpretation. All authors provided critical review and contributed to the write-up and approved  
268 the final version of the manuscript. MH had final responsibility to submit for publication. All  
269 authors read and amended drafts of the paper and approved the final version.

270 **Funding:** No funding was obtained. But A PhD Scholarship supported by the research from the  
271 Belgian Development Cooperation through the VLIR-UOS network program (University  
272 collaboration for better health in Ethiopia (UCBHE).

273 Competing interests: no competing interest

274 **Patient consent:** Obtained. All participants provided written, informed consent for study  
275 participation.

276 **Ethics approval:** Ethical approval from all of the appropriate institutional review boards was  
277 obtained. The ethics review committee of Hawassa University (CMHS/283/2012), Jimma  
278 University (IHRPGD/458/2020), National Health Research Ethics Review Committee  
279 (SRA/14.1/ 144483/2020) Ethiopia, and Ghent University (PA2019-038/BC-08458) Belgium,  
280 approved the study.

281 **Data sharing statement:** No additional data are available.

## 282 References

- 283 1. Manicklal S, Emery VC, Lazzarotto T, Boppana SB, Gupta RK. The “Silent” Global  
284 Burden of Congenital Cytomegalovirus. *Clinical microbiology reviews*. 2013;**26**(1):86-102.
- 285 2. Nolan N, Halai UA, Regunath H, Smith L, Rojas-Moreno C, Salzer W. Primary  
286 cytomegalovirus infection in immunocompetent adults in the United States - A case series.  
287 *IDCases*. 2017;**10**:123-6.
- 288 3. Lazzarotto T, Blázquez-Gamero D, Delforge M-L, Foulon I, Luck S, Modrow S, et al.  
289 Congenital Cytomegalovirus Infection: A Narrative Review of the Issues in Screening and  
290 Management From a Panel of European Experts. *Frontiers in pediatrics*. 2020;**8**(13).
- 291 4. Britt WJ. Maternal Immunity and the Natural History of Congenital Human  
292 Cytomegalovirus Infection. *Viruses*. 2018;**10**(8):405.
- 293 5. Mussi-Pinhata MM, Yamamoto AY. Natural History of Congenital Cytomegalovirus  
294 Infection in Highly Seropositive Populations. *The Journal of infectious diseases*.  
295 2020;**221**(Supplement\_1):S15-s22.
- 296 6. Mamuye Y BN, Delayehu B, Mekonen G Seroepidemiology study of CMV and Rubella  
297 among pregnant women at St. Paul’s Hospital Millennium Medical College, Addis Ababa,  
298 Ethiopia . *Ethiop J Health Sciences*. 2016;**26**:427.

- 299 7. Maingi Z, Nyamache AK. Seroprevalence of Cytomegalo Virus (CMV) among pregnant  
300 women in Thika, Kenya. *BMC research notes*. 2014;**7**:794-.
- 301 8. Khairi S, Intisar K, Enan K, Ishag M, Baraa A, Ali Y. Seroprevalence of cytomegalovirus  
302 infection among pregnant women at Omdurman Maternity Hospital, Sudan. *Journal of Medical*  
303 *Laboratory and Diagnosis*. 2013;**4**(4):45-9.
- 304 9. Mhandire D, Rowland-Jones S, Mhandire K, Kaba M, Dandara C. Epidemiology of  
305 Cytomegalovirus among pregnant women in Africa. *Journal of infection in developing countries*.  
306 2019;**13**(10):865-76.
- 307 10. Bates M, Brantsaeter AB. Human cytomegalovirus (CMV) in Africa: a neglected but  
308 important pathogen. *Journal of virus eradication*. 2016;**2**(3):136-42.
- 309 11. Ross SA, Fowler KB, Ashrith G, Stagno S, Britt WJ, Pass RF, et al. Hearing loss in  
310 children with congenital cytomegalovirus infection born to mothers with preexisting immunity.  
311 *The Journal of pediatrics*. 2006;**148**(3):332-6.
- 312 12. Bates M, Brantsaeter AB. Human cytomegalovirus (CMV) in Africa: a neglected but  
313 important pathogen. *Journal of virus eradication*. 2016;**2**(3):136-42.
- 314 13. Fowotade A, Okonko IO, Agbede OO, Suleiman ST. High seropositivity of IgG and IgM  
315 antibodies against cytomegalovirus (CMV) among HIV-1 seropositive patients in Ilorin, Nigeria.  
316 *African health sciences*. 2015;**15**(1):1-9.
- 317 14. Ray K, Mahajan M. Seroprevalence of cytomegalovirus antibodies in patients attending  
318 STD and antenatal clinics. *J Commun Dis*. 1997;**29**(2):85-90.
- 319 15. Mhandire D, Duri K, Kaba M, Mhandire K, Musarurwa C, Chimusa E, et al.  
320 Seroprevalence of Cytomegalovirus Infection Among HIV-Infected and HIV-Uninfected  
321 Pregnant Women Attending Antenatal Clinic in Harare, Zimbabwe. *Viral immunology*.  
322 2019;**32**(7):289-95.
- 323 16. Chibwe E, Mirambo MM, Kihunrwa A, Mshana SE. Magnitude of the Cytomegalovirus  
324 infection among pregnant women attending antenatal clinics in the city of Mwanza, Tanzania.  
325 *BMC research notes*. 2017;**10**(1):489.
- 326 17. Hamdan HZ, Abdelbagi IE, Nasser NM, Adam I. Seroprevalence of cytomegalovirus and  
327 rubella among pregnant women in western Sudan. *Virology journal*. 2011;**8**:217.
- 328 18. Kamel N, Metwally L, Gomaa N, Sayed Ahmed WA, Lotfi M, Younis S. Primary  
329 cytomegalovirus infection in pregnant Egyptian women confirmed by cytomegalovirus IgG  
330 avidity testing. *Medical principles and practice : international journal of the Kuwait University,*  
331 *Health Science Centre*. 2014;**23**(1):29-33.
- 332 19. Gyselaers W, Jonckheer P, Ahmadzai N, Ansari M, Carville S, Dworzynski K, et al.  
333 What are the recommended clinical assessment and screening tests during pregnancy? Good  
334 Clinical Practice (GCP) Brussels: Belgian Health Care Knowledge Centre (KCE). 2015. KCE  
335 Reports 248. *KCE Reports*. 2017;248.
- 336 20. Vaudry W, Rosychuk RJ, Lee BE, Cheung PY, Pang X, Preiksaitis JK. Congenital  
337 cytomegalovirus infection in high-risk Canadian infants: Report of a pilot screening study. *The*  
338 *Canadian journal of infectious diseases & medical microbiology = Journal canadien des*  
339 *maladies infectieuses et de la microbiologie medicale*. 2010;**21**(1):e12-9.
- 340 21. Revello MG, Gerna G. Diagnosis and management of human cytomegalovirus infection  
341 in the mother, fetus, and newborn infant. *Clinical microbiology reviews*. 2002;**15**(4):680-715.
- 342 22. Maingi Z, Nyamache AK. Seroprevalence of Cytomegalo Virus (CMV) among pregnant  
343 women in Thika, Kenya. *BMC research notes*. 2014;**7**:794.

- 344 23. Tookey PA, Ades AE, Peckham CS. Cytomegalovirus prevalence in pregnant women:  
345 the influence of parity. *Archives of disease in childhood*. 1992;**67**(7 Spec No):779-83.
- 346 24. Yeroh M, Aminu M, Musa B. Seroprevalence of cytomegalovirus infection amongst  
347 pregnant women in Kaduna state, Nigeria. *African Journal of Clinical and Experimental*  
348 *Microbiology*. 2015;**16**(1):37-44.
- 349 25. Fowler KB, Pass RF. Risk Factors for Congenital Cytomegalovirus Infection in the  
350 Offspring of Young Women: Exposure to Young Children and Recent Onset of Sexual Activity.  
351 *Pediatrics*. 2006;**118**(2):e286-e92.
- 352 26. Cannon MJ, Hyde TB, Schmid DS. Review of cytomegalovirus shedding in bodily fluids  
353 and relevance to congenital cytomegalovirus infection. *Rev Med Virol*. 2011;**21**(4):240-55.
- 354 27. Pass RF, Hutto C, Ricks R, Cloud GA. Increased rate of cytomegalovirus infection  
355 among parents of children attending day-care centers. *The New England journal of medicine*.  
356 1986;**314**(22):1414-8.
- 357 28. Hyde TB, Schmid DS, Cannon MJ. Cytomegalovirus seroconversion rates and risk  
358 factors: implications for congenital CMV. *Rev Med Virol*. 2010;**20**(5):311-26.
- 359 29. Pitlick MM, Orr K, Momany AM, McDonald EL, Murray JC, Ryckman KK.  
360 Determining the prevalence of cytomegalovirus infection in a cohort of preterm infants. *Journal*  
361 *of neonatal-perinatal medicine*. 2015;**8**(2):137-41.
- 362 30. Shakya S, Thingulstad S, Syversen U, Nordbø SA, Madhup S, Vaidya K, et al.  
363 Prevalence of Sexually Transmitted Infections among Married Women in Rural Nepal. *Infectious*  
364 *Diseases in Obstetrics and Gynecology*. 2018;2018:4980396.
- 365 31. Staras SA, Flanders WD, Dollard SC, Pass RF, McGowan JE, Jr., Cannon MJ. Influence  
366 of sexual activity on cytomegalovirus seroprevalence in the United States, 1988-1994. *Sexually*  
367 *transmitted diseases*. 2008;**35**(5):472-9.
- 368 32. Adachi K, Xu J, Yeganeh N, Camarca M, Morgado MG, Watts DH, et al. Combined  
369 evaluation of sexually transmitted infections in HIV-infected pregnant women and infant HIV  
370 transmission. *PloS one*. 2018;**13**(1):e0189851.

371

372

373
